# Supplementary material for: Persistent Innate Immune Stimulation Results in IRF3-Mediated but Caspase-Independent Cytostasis
Source: MDPI journal article supplement (doi:10.3390/v12060635), 2020-06-11
Supplement: s1 [file s1]

# Supplementary File S1

**Table S1.1.** Plasmids

| Name                               | Origin                                                  |
|------------------------------------|---------------------------------------------------------|
| pDONR207                           | Invitrogen, Carlsbad, CA                                |
| pCMV-dr8.91                        | Didier Trono, EPFL, Lausanne, Schweiz                   |
| pMD2.G                             | Didier Trono, EPFL, Lausanne, Schweiz                   |
| pWPI BLR rfb                       | Binder <i>et al.</i> , 2007                             |
| pWPI EF1a BLR Con1 NS3/4A wt       | Volker Lohmann, Heidelberg University Hospital, Germany |
| pWPI EF1a BLR Con1 NS3/4A S139A    | Volker Lohmann, Heidelberg University Hospital, Germany |
| lentiCRISPRv2 puro                 | Feng Zhang, Addgene #52961                              |
| pWPI EF1a BLR NS5B dc21 WT eGFP    | This study                                              |
| pWPI EF1a BLR NS5B dc21 dGDD eGFP  | This study                                              |
| pWPI EF1a BLR NS5B dc21 GND eGFP   | This study                                              |
| lentiCRISPRv2 puro IRF3 guideRNA 1 | This study                                              |

**Table S1.2.** Primers

| Name                  | Purpose             | Sequence                                                |
|-----------------------|---------------------|---------------------------------------------------------|
| GAPDH fwd             | qPCR GAPDH          | TCGGAGTCAACGGATTGCT                                     |
| GAPDH rev             | qPCR GAPDH          | TTCCCGTTCTCAGCCTTGAC                                    |
| ISG56 fwd             | qPCR IFIT1          | GAATAGCCAGATCTCAGAGGAGC                                 |
| ISG56 rev             | qPCR IFIT1          | CCATTTGTACTCATGGTTGCTGT                                 |
| IFN- $\lambda$ -1 fwd | qPCR IFN- $\lambda$ | GGTGACTTTGGTGCTAGGCT                                    |
| IFN- $\lambda$ -1 rev | qPCR IFN- $\lambda$ | TGAGTGACTCTTCCAAGGCG                                    |
| IFN- $\beta$ -1 fwd   | qPCR IFN- $\beta$   | CATTCGGAAATGTCAGGAGC                                    |
| IFN- $\beta$ -1 rev   | qPCR IFN- $\beta$   | TGGAGCATCTCTTGGATGG                                     |
| NS5B d21 fwd          | qPCR NS5B           | CAAGTATGGATTCTGGGGCCA                                   |
| NS5B d21 rev          | qPCR NS5B           | CAGGGTAAACGATGAGGCGA                                    |
| attB1NS5B fwd         | PCR                 | GGGGACAAGTTTGTACAAAAAAGCAGGCTTCATGTC<br>ATACTCCTGGACCGG |
| NS5B_GFP fwd          | PCR                 | CGCGCGCCCGACCCCGCGTGAGCAAGGGCGAGG                       |
| NS5B_GFP rev          | PCR                 | CCTCGCCCTTGCTCACGCGGGGTCTGGGCGCG                        |
| attB2GFP rev          | PCR                 | GGGGACCACTTTGTACAAGAAAGCTGGGTTTACTTG<br>TACAGCTCGTCC    |

**Table S1.3.** Antibodies

| Name                                                                  | Origin                                                  | Identifier    |
|-----------------------------------------------------------------------|---------------------------------------------------------|---------------|
| Donkey polyclonal anti-Rabbit Alexa Fluor 647                         | Invitrogen, Carlsbad, CA                                | A-31573       |
| Goat polyclonal anti-mouse-HRP                                        | Sigma Aldrich, Munich, Germany                          | A4416         |
| Goat polyclonal anti-rabbit-HRP                                       | Sigma Aldrich                                           | A6154         |
| Mouse monoclonal anti-ACTB                                            | Santa Cruz, Dallas, TX                                  | SC-47778      |
| Rabbit monoclonal anti-HA-HRP                                         | Cell Signaling, Danvers, MA                             | 3724          |
| Rabbit monoclonal anti-IRF3 (D6I4C) XP                                | Cell Signaling                                          | 11904S        |
| Rabbit polyclonal anti-CANX                                           | Enzo Life Sciences, Farmingdale, NY                     | ADI-SPA-865-F |
| Rabbit polyclonal anti-IFIT1                                          | Abnova, Taipei, Taiwan                                  | H00003434-DO1 |
| Rabbit anti-human-IFIT3 (3 µg/µl, in PBS-glycerin, affinity-purified) | Self-made Pichlmair, Lassnig (1)                        | N/A           |
| Rabbit anti-NS5B                                                      | Volker Lohmann, Heidelberg University Hospital, Germany | N/A           |
